# Supplementary material for: Characterization of the Specific Mode of Action of a Chitin Deacetylase and Separation of the Partially Acetylated Chitosan Oligosaccharides
Source: Mar Drugs. 2019 Jan 22;17(2):74. doi: 10.3390/md17020074 (PMC6409515; doi:10.3390/md17020074)
Supplement: Supplementary file 1 [file marinedrugs-17-00074-s001.pdf]

## *Supplementary Materials*

# **Characterization of the Specific Mode of Action of a Chitin Deacetylase and Separation of the Partially Acetylated Chitosan Oligosaccharides**

**Xian-Yu Zhu <sup>1,2</sup>, Yong Zhao <sup>1</sup>, Huai-Dong Zhang <sup>1,3</sup>, Wen-Xia Wang <sup>1</sup>, Hai-Hua Cong <sup>2</sup> and Heng Yin <sup>1,\*</sup>**

<sup>1</sup> Liaoning Provincial Key Laboratory of Carbohydrates, Dalian Institute of Chemical Physics, Chinese Academy of Sciences, Dalian 116023, China; zhuxy0721@126.com (X.-Y.Z.); zhaoyong\_2019@163.com (Y.Z.); huaidongzhang@yahoo.com (H.-D.Z.); wangwx@dicp.ac.cn (W.-X.W.)

<sup>2</sup> College of Food Science and Engineering, Dalian Ocean University, Dalian 116023, China; haihuacong780@gmail.com

<sup>3</sup> Engineering Research Center of Industrial Microbiology, Ministry of Education; College of Life Sciences, Fujian Normal University, Fujian 350117, China

\* Correspondence: yinheng@dicp.ac.cn; Tel./Fax: +86-0411-84379061

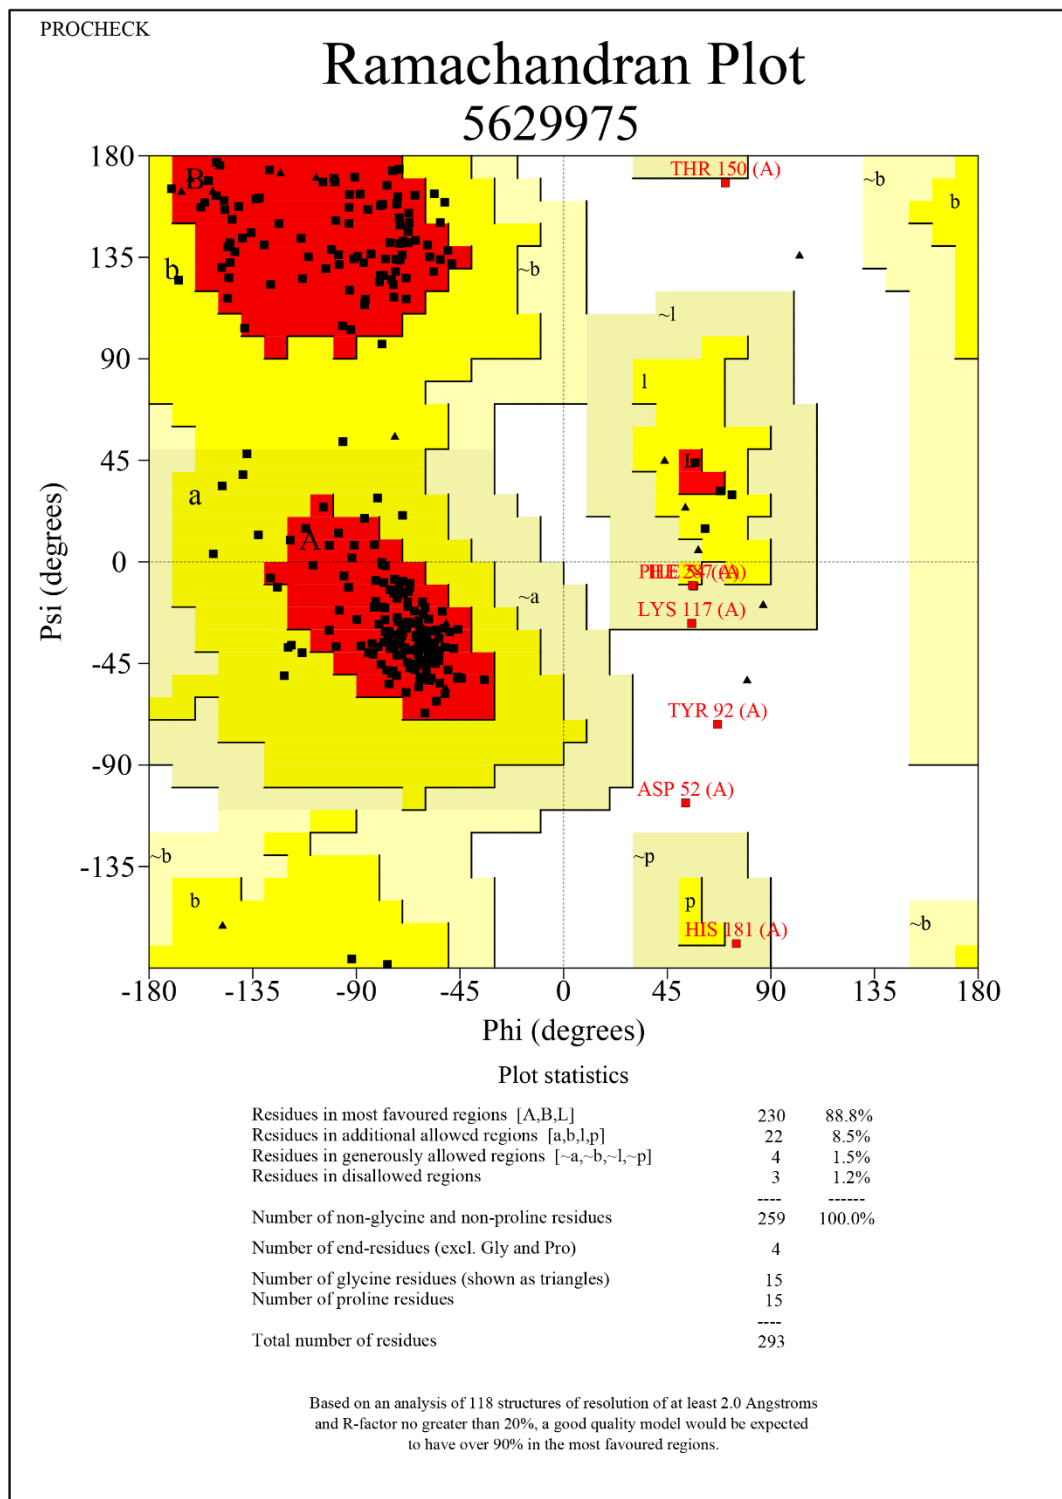

5629975\_01.ps

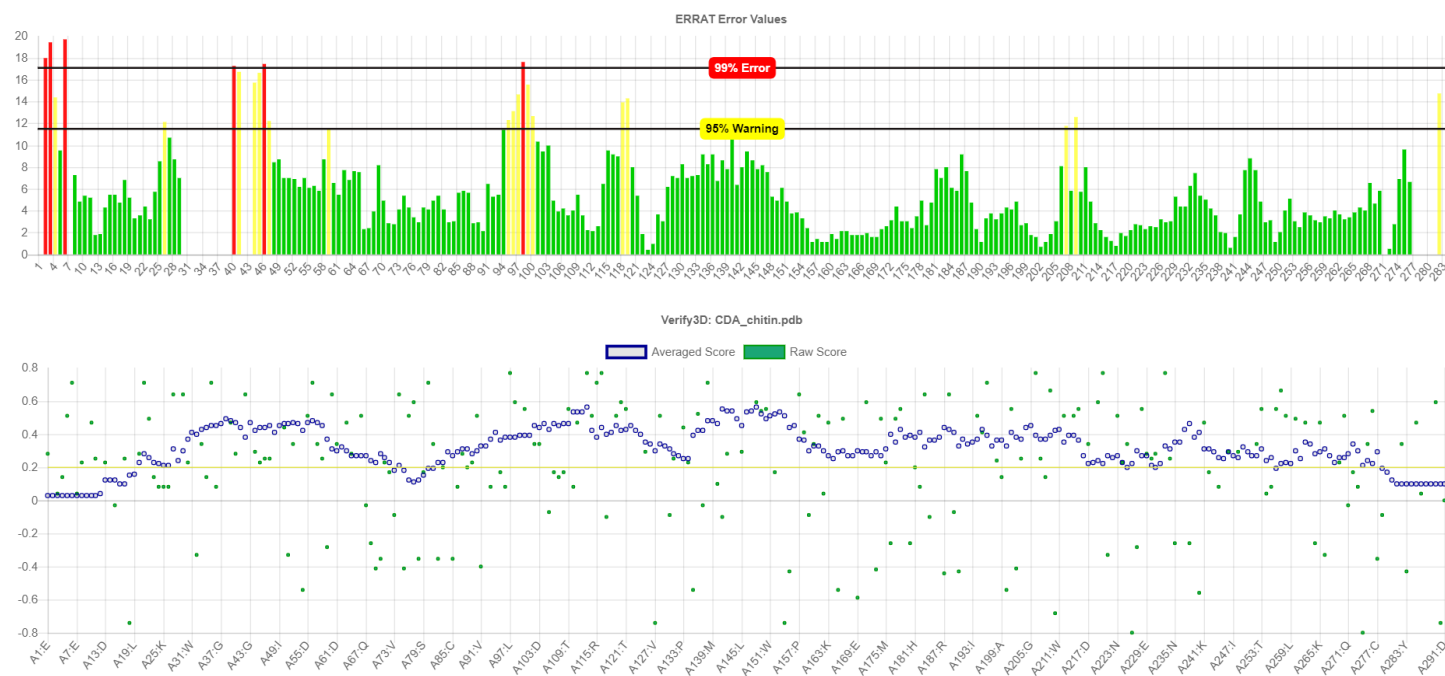

**Figure S1.** The model was further evaluated for protein geometry by SAVES (A comprehensive measurement website for the quality of a protein structure). 97.3% Residues in additional allowed regions and 85.57% of the residues have averaged 3D-1D score  $\geq 0.2$ , and the quality factor is 91.2214.

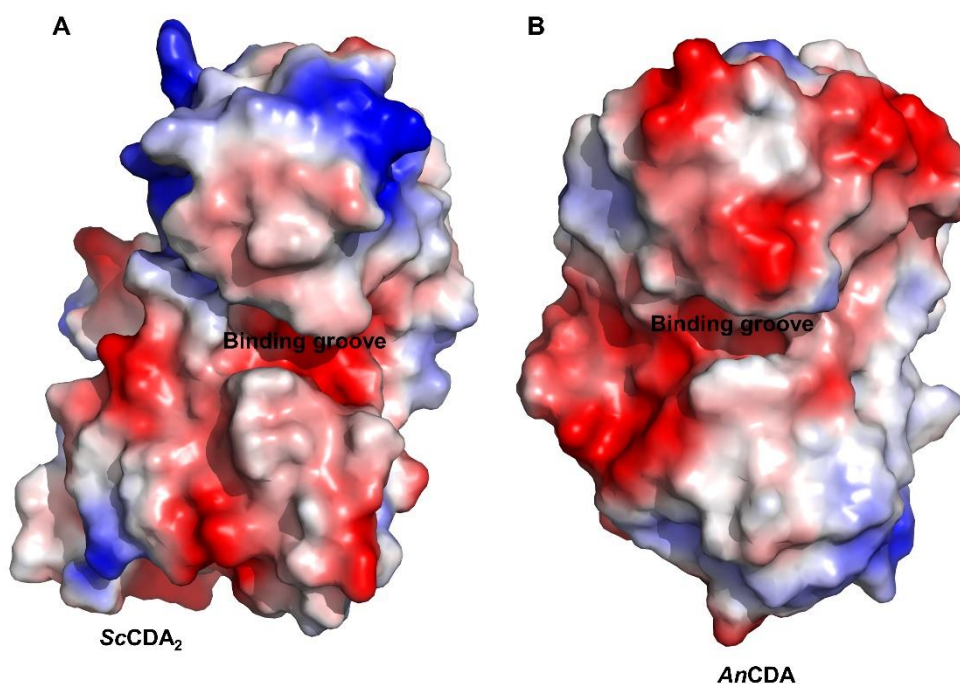

**Figure S2.** Compare deacetylase charge distribution. These pictures show the surface charge distributions of chitin deacetylase from *Saccharomyces cerevisiae* (ScCDA<sub>2</sub>) and chitin deacetylase from *Aspergillus Nidulans* (AnCDA, PDB ID: 2Y8U) calculated using ABPS (The Adaptive Poisson-Boltzmann Solver to generate electrostatic surface displayed) in VMD. Red represents a negative charge and blue represents a positive charge.

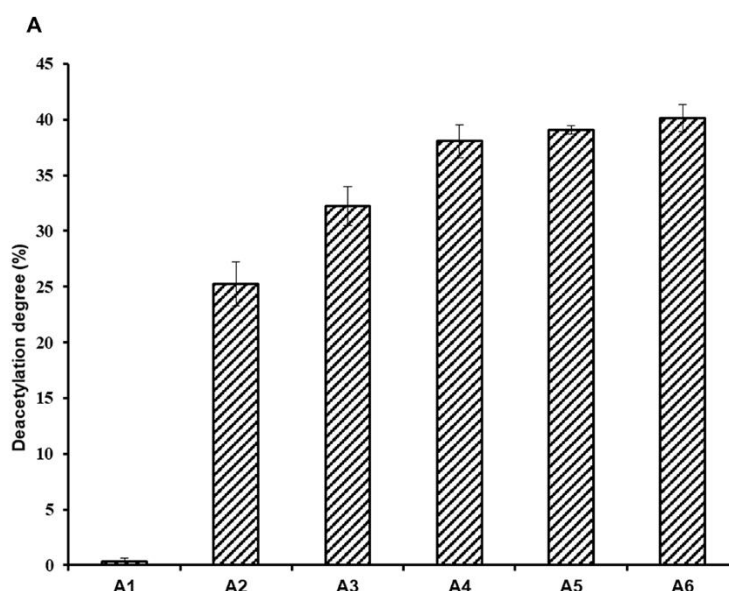

**Figure S3.** ScCDA<sub>2</sub> substrate specificity on chitin oligomers. 0.5mg/ml chitin oligomers as substrates were incubated with 0.75  $\mu$ M ScCDA<sub>2</sub> at 37  $^{\circ}$ C for 30 min. The data represents the mean SD values of the results from three independent experiments.

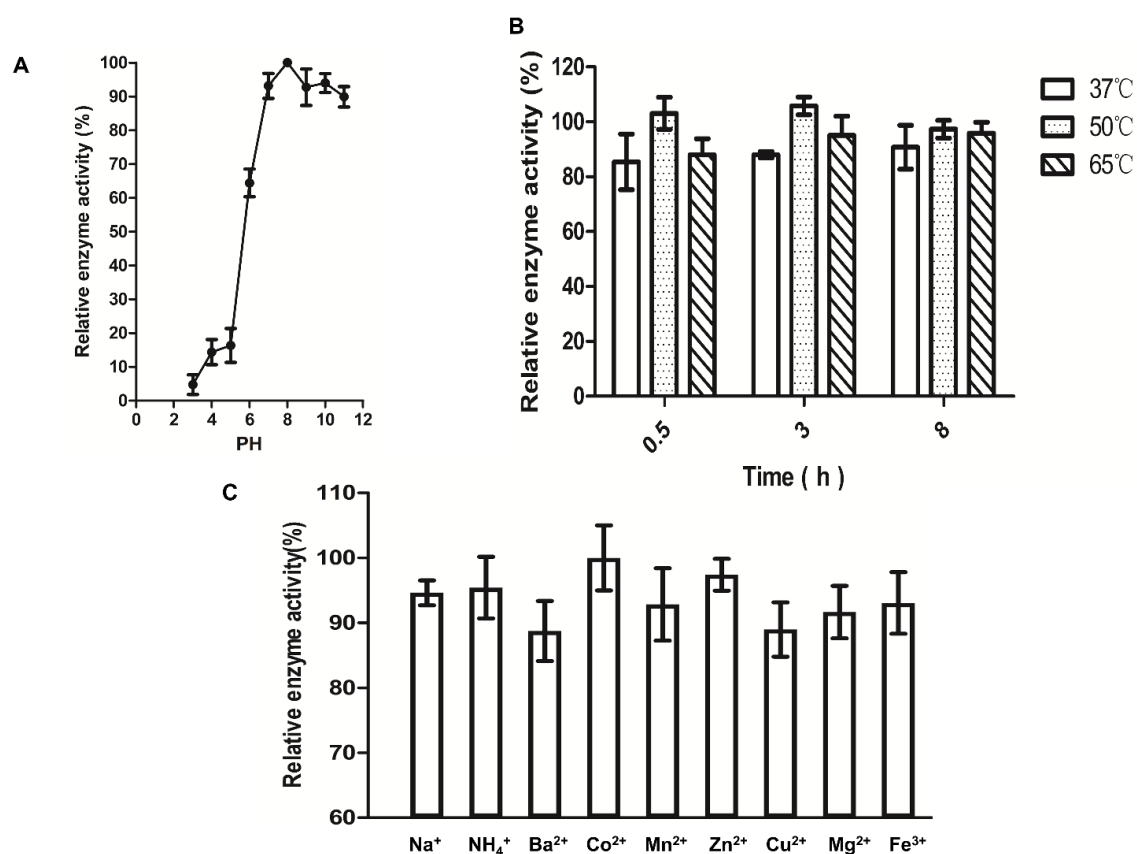

**Figure S4.** Effects of pH, temperature and metal ion on enzyme activity. **(A)** The optimum pH was determined by incubating the 0.75  $\mu$ M ScCDA<sub>2</sub> with A4 chitin oligomer (0.5 mg/mL) for 60 min at pH 3–11 in universal buffer. **(B)** To obtain the optimal temperature, the enzyme (0.75  $\mu$ mol) was incubated for 60 min at different temperatures in 50 mM Tris-HCl buffer (pH 8.0) containing chitin oligomer mixture (0.5 mg/mL) as a substrate. **(C)** Relative activity with different metal cations. Proteins were incubated with 1 mM metallized cations, and activity was determined in 50 mM Tris-HCl buffer (pH 8.0) using 0.5 mg/mL A4 as a substrate.

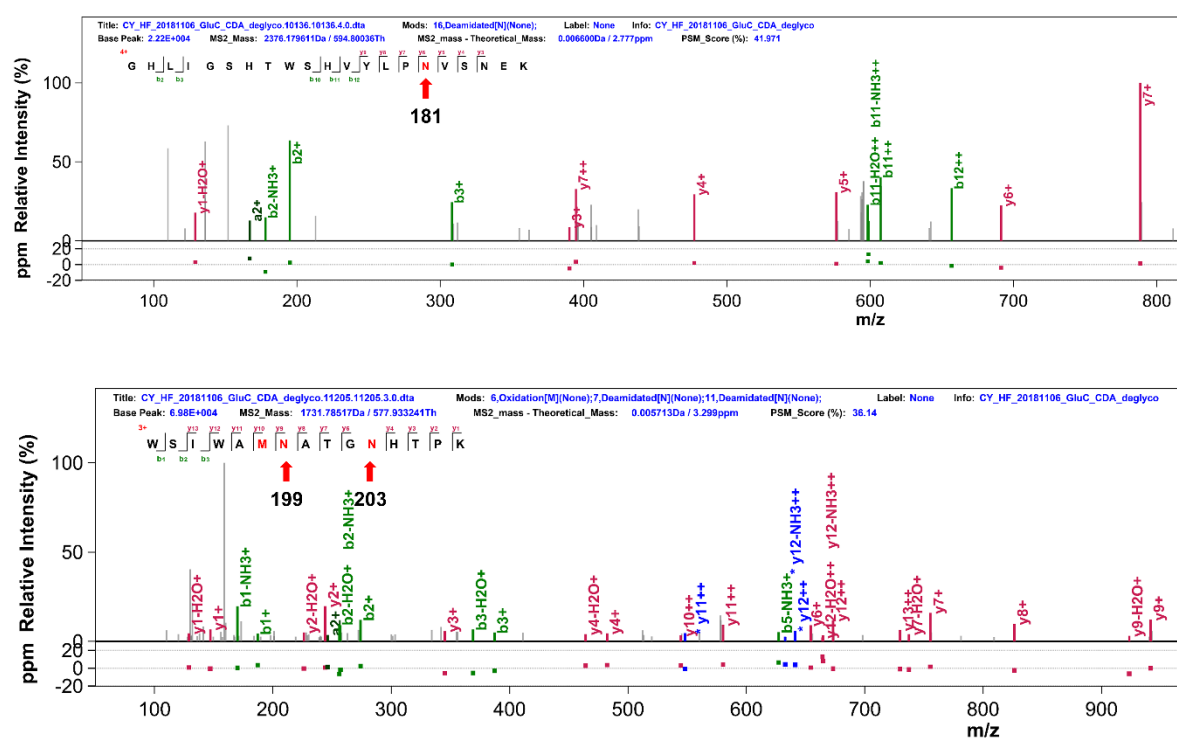

**Figure S5.** Spectra of N-glycosylation of ScCDA<sub>2</sub>. Mass spectrometry showed that ScCDA<sub>2</sub> have N-glycosylation post-translational modification at Asn 181, Asn 199 and Asn 203.
